# Supplementary material for: Measuring naturally acquired ex vivo IFN-γ responses to Plasmodium falciparum cell-traversal protein for ookinetes and sporozoites (CelTOS) in Ghanaian adults
Source: Springer Nature journal article supplement (doi:10.1186/s12936-014-0539-5), 2015-01-20

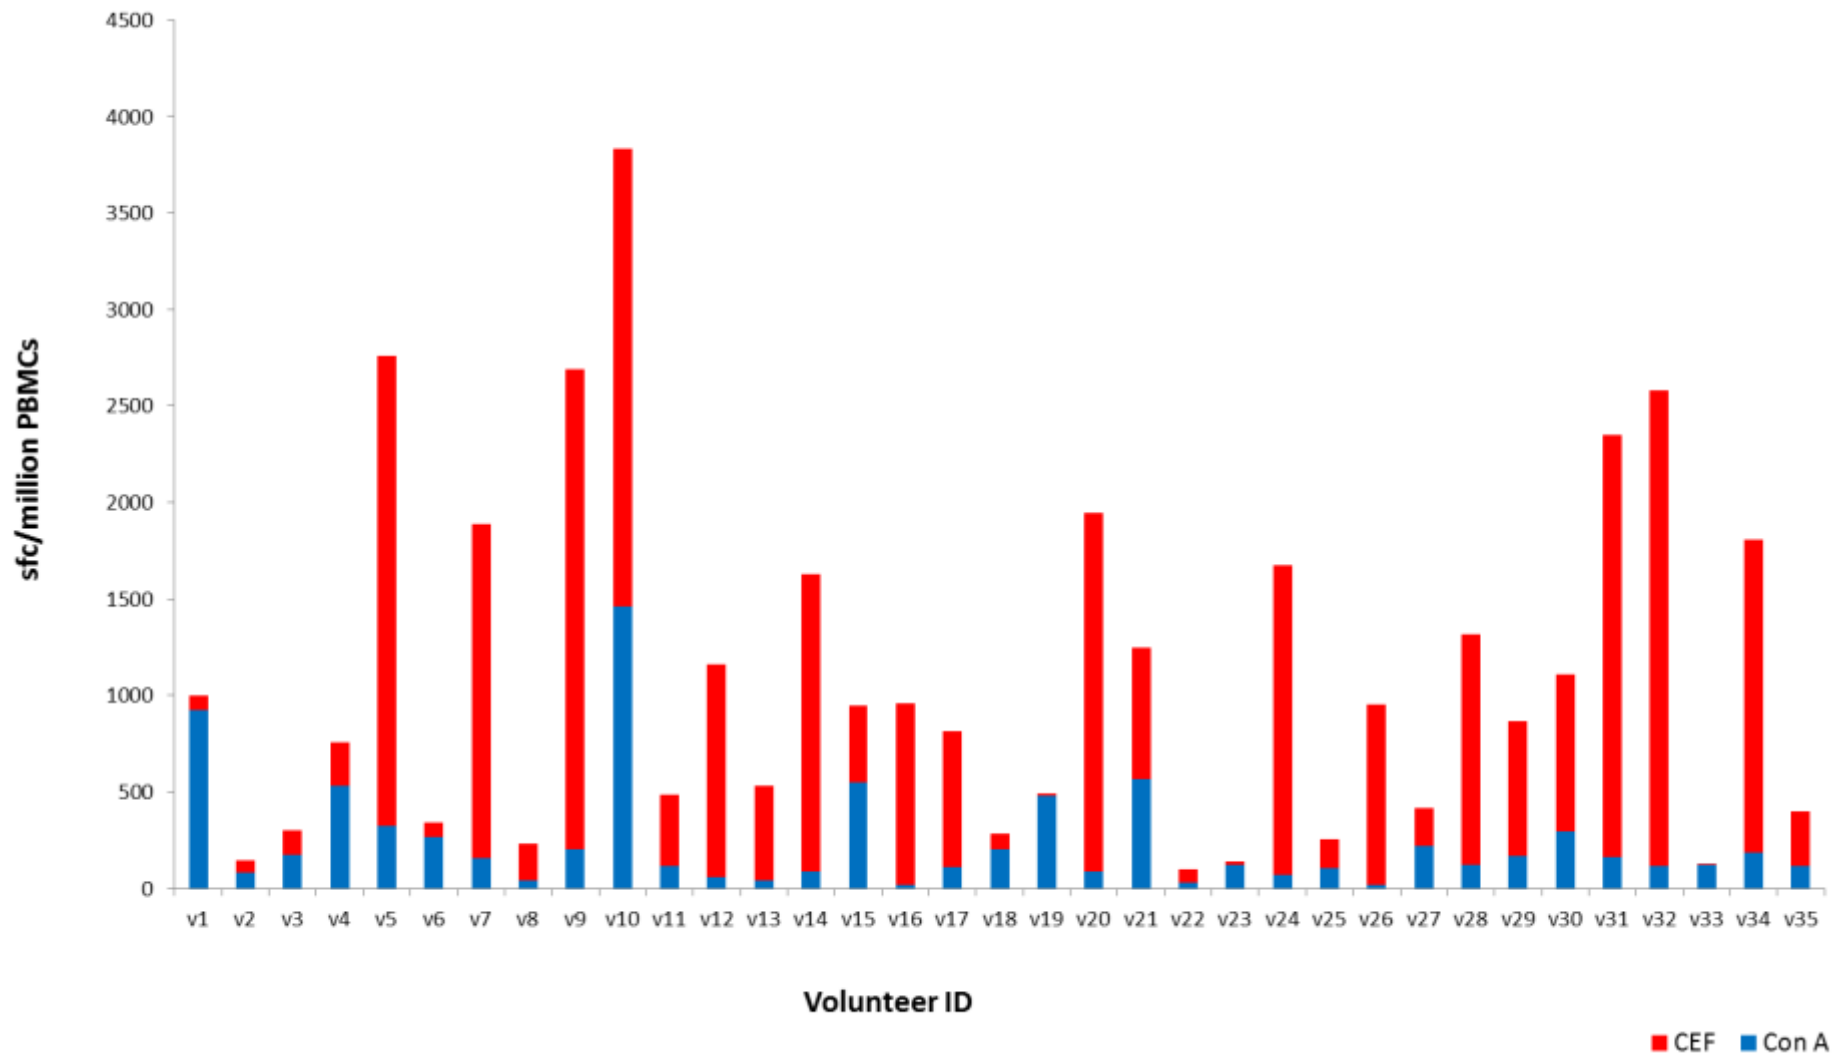

Supplement: MOESM1 [file 9760952]
